# Supplementary material
Source: PubMed Central journal article supplement (PMC8562927)
Supplement: NIHMS1746295-supplement-1.pdf [file NIHMS1746295-supplement-1.pdf]

## SUPPLEMENTAL TABLE

## List of differentially expressed microRNAs

| microRNA name   | Fold difference | <i>q</i> value (Wilcoxon) |
|-----------------|-----------------|---------------------------|
| hsa-miR-17-5p   | -0.860          | .0019                     |
| hsa-miR-106a-5p | -0.842          | .0019                     |
| hsa-miR-200c-3p | -0.942          | .0019                     |
| hsa-miR-885-5p  | -0.730          | .0019                     |
| hsa-miR-30c-5p  | -0.913          | .0019                     |
| hsa-miR-200b-3p | -0.949          | .0019                     |
| hsa-miR-191-5p  | -0.903          | .0019                     |
| hsa-miR-146b-5p | -0.913          | .0019                     |
| hsa-miR-19b-3p  | -0.807          | .0021                     |
| hsa-miR-200a-3p | -0.718          | .0021                     |
| hsa-miR-30b-5p  | -0.909          | .0021                     |
| hsa-miR-24-3p   | -0.933          | .0021                     |
| hsa-miR-302b-3p | -0.989          | .0021                     |
| hsa-miR-222-3p  | -0.947          | .0021                     |
| hsa-miR-28-3p   | -0.815          | .0021                     |
| hsa-miR-342-3p  | -0.935          | .0021                     |
| hsa-miR-125a-5p | -0.928          | .0021                     |
| hsa-miR-449b-5p | -0.791          | .0023                     |
| hsa-miR-221-3p  | -0.887          | .0023                     |
| hsa-miR-539-5p  | -0.929          | .0023                     |

Data are presented as number unless otherwise indicated.

Willner et al. Amniotic fluid microRNAs in twin-twin transfusion syndrome cardiomyopathy. *Am J Obstet Gynecol* 2021.
